# Supplementary material
Source: PubMed Central journal article supplement (PMC4380132)

## Supplemental Material

### Air quality in Lanzhou, China: Characteristics of air pollution and review of existing evidence from air pollution and health studies

Yaqun Zhang, Min Li, Mercedes A. Bravo, Lan Jin, Amruta Nori-Sarma, Yanwen Xu, Donghong Guan, Chengyuan Wang, Mingxia Chen, Xiao Wang, Wei Tao, Weitao Qiu, Yawei Zhang, Michelle L. Bell

**Figure S1.** Elevation of Lanzhou Citycenter and placement of monitors

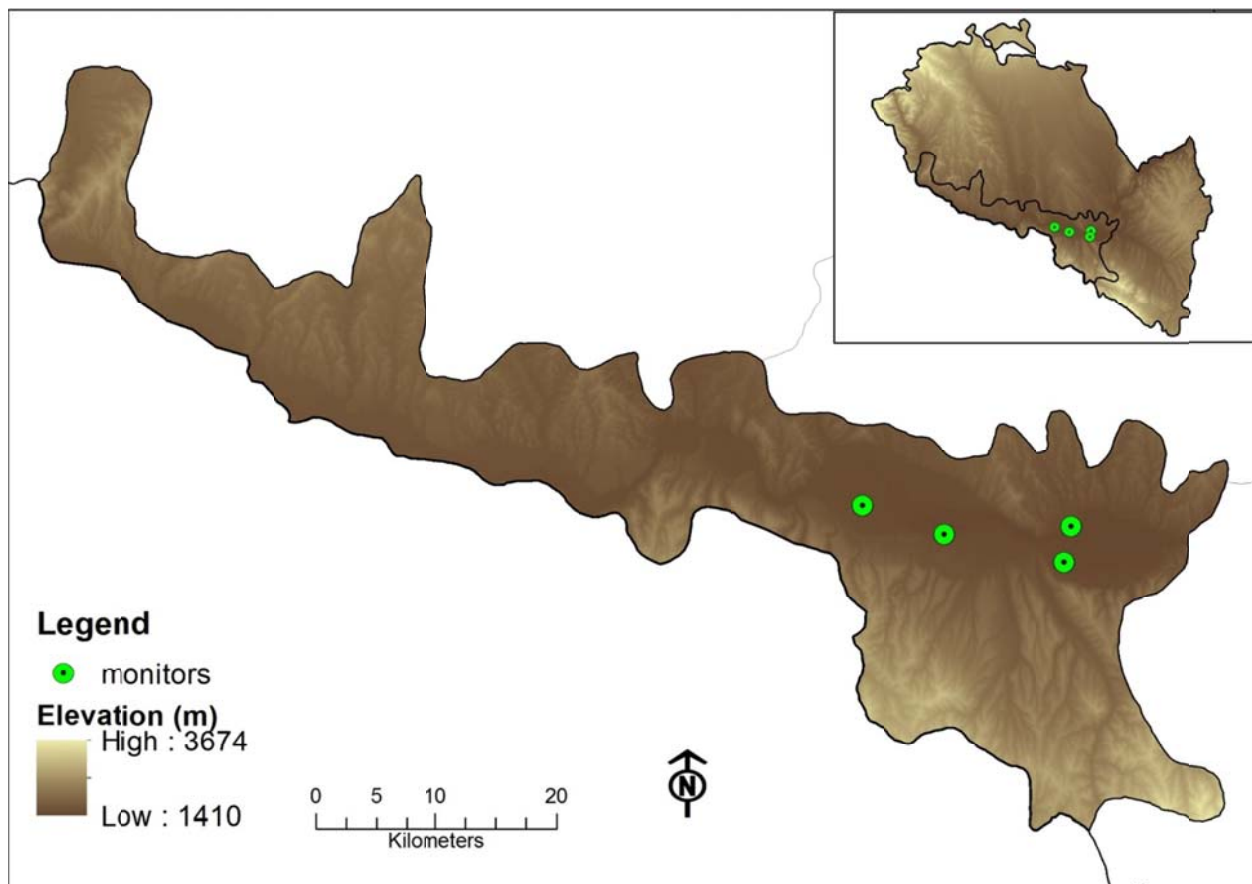

**Figure S2.** PM<sub>10</sub> levels over time, by pollutant and station.

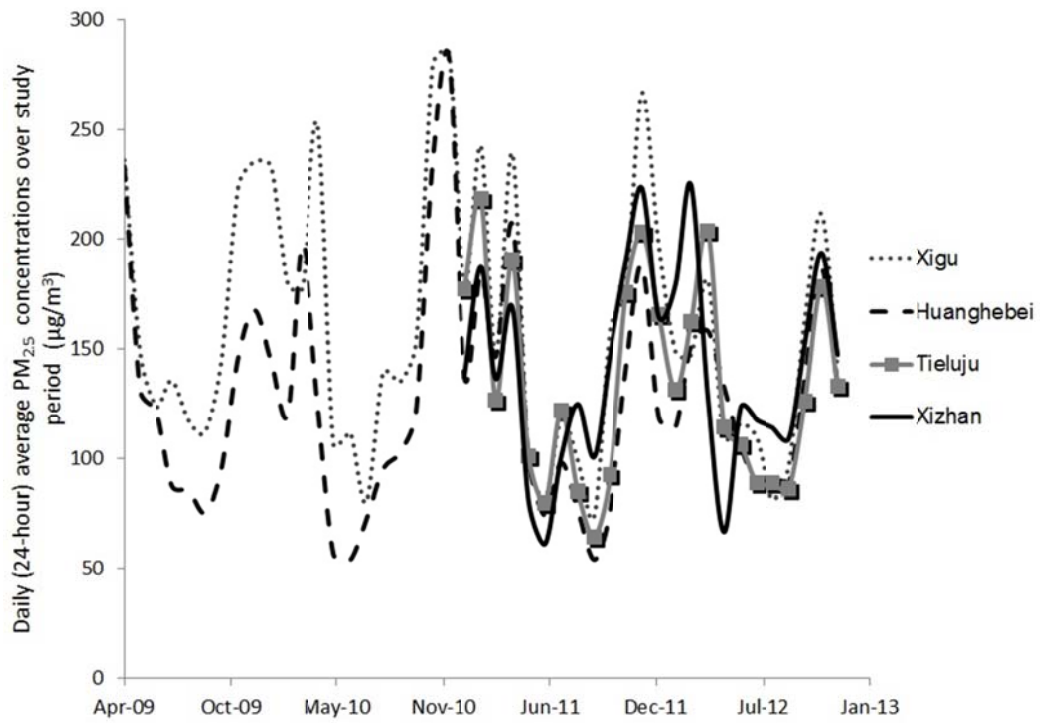

**Figure S3.** NO<sub>2</sub> levels over time, by pollutant and station

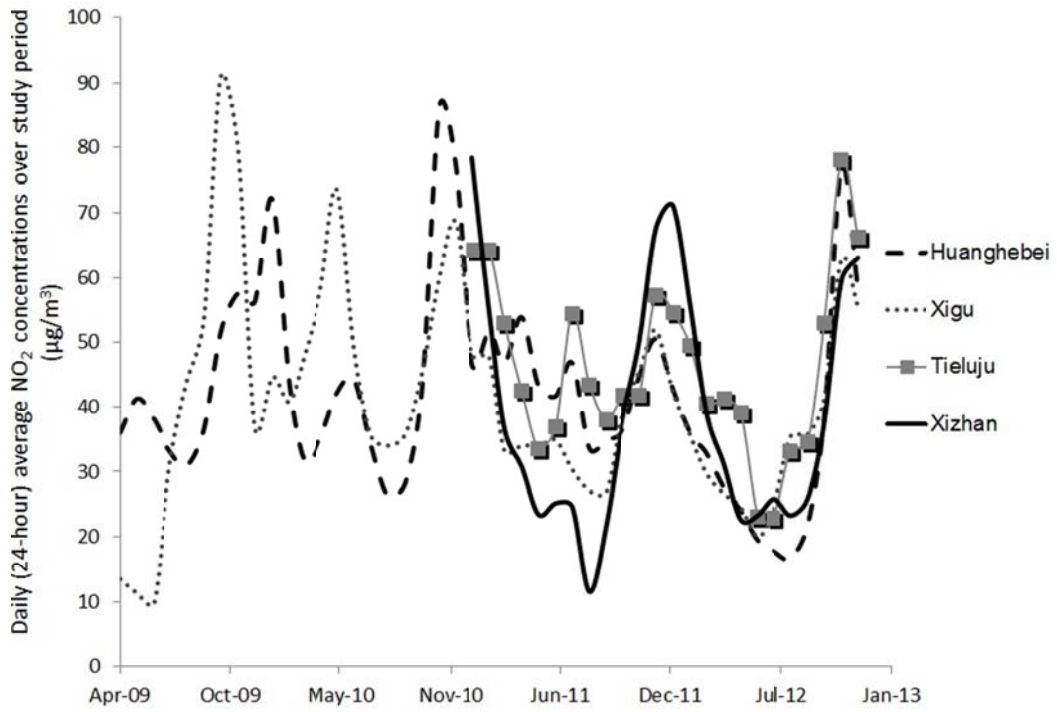

**Figure S4.** SO<sub>2</sub> levels over time, by pollutant and station

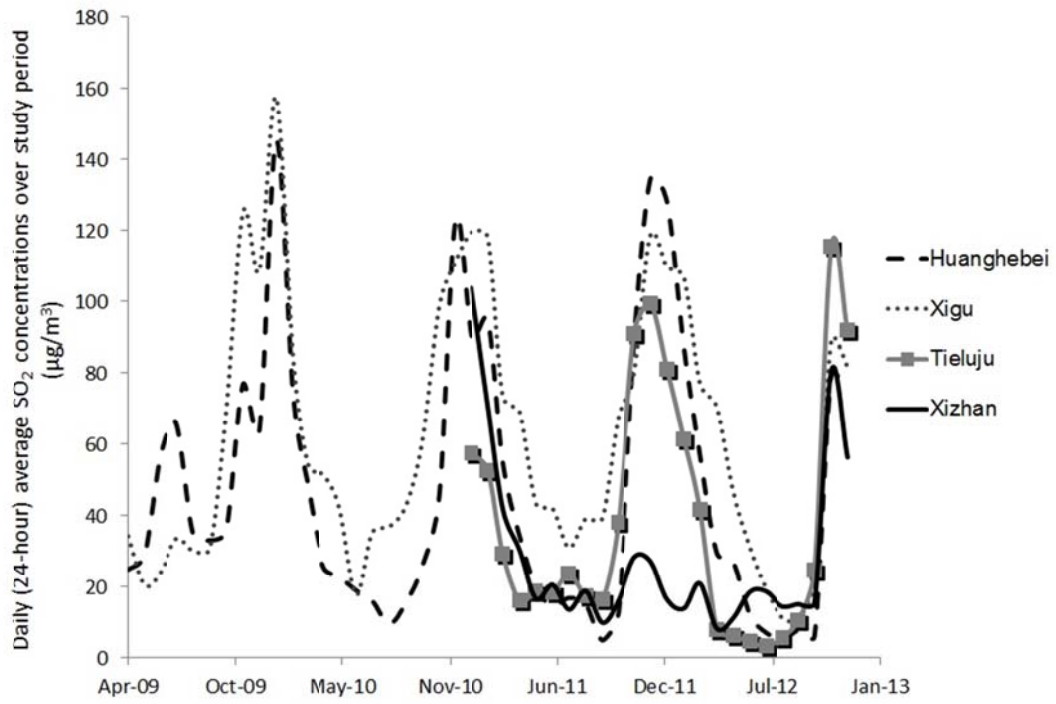

**Figure S5.** PM<sub>10</sub>, NO<sub>2</sub>, and SO<sub>2</sub> levels across study area by day of week

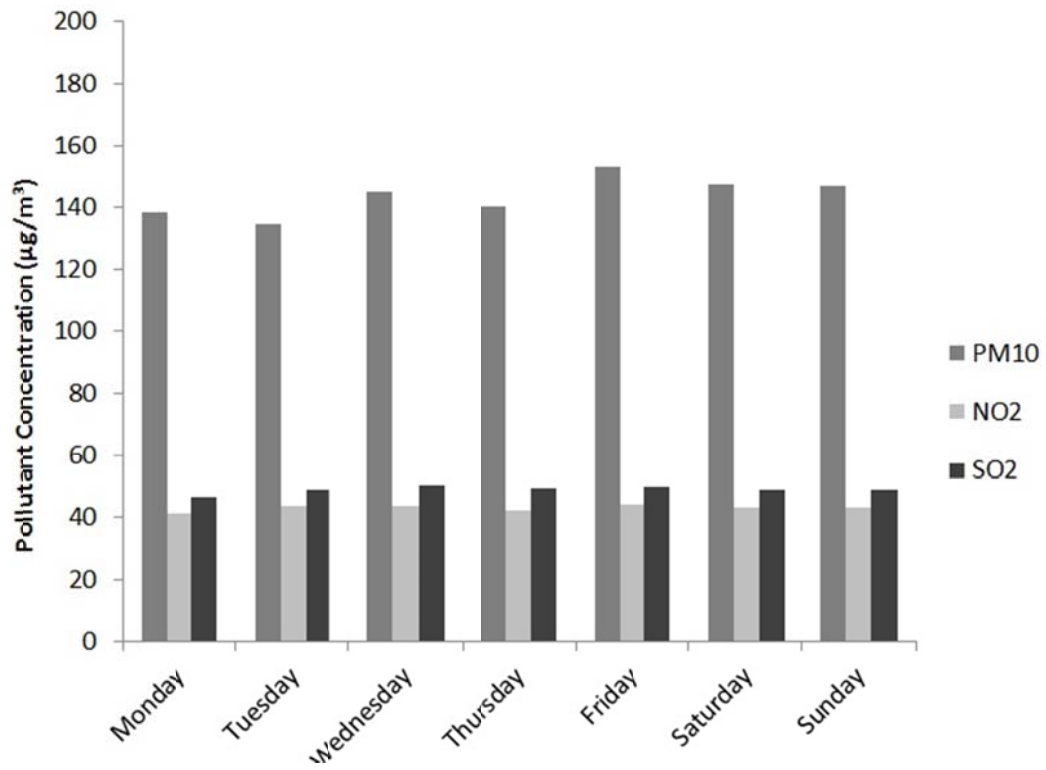

**Figure S6.** Coefficient of divergence between daily average observed pollution levels vs. distance between monitor locations

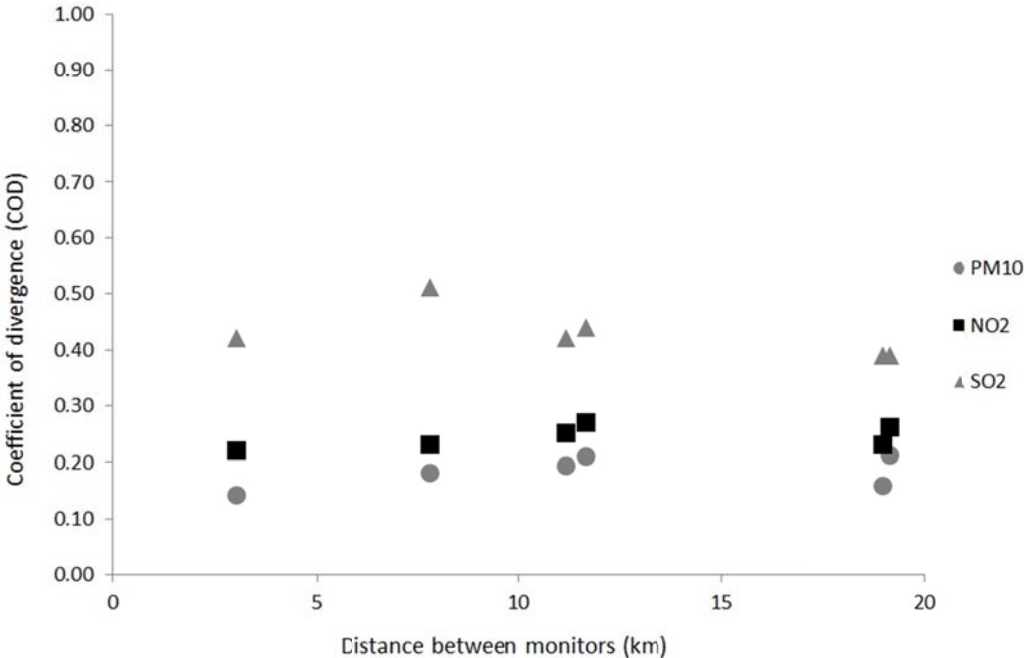

Supplement: NIHMS664096-supplement-Supplemental_Data.pdf [file NIHMS664096-supplement-Supplemental_Data.pdf]
